# Supplementary material for: Compliance to the smoke-free law in Guatemala 5-years after implementation
Source: PubMed Central journal article supplement (PMC4852414; doi:10.1186/s12889-016-2960-x), 2016-04-12
Supplement: 12889_2016_2960_MOESM1_ESM.pdf [file 12889_2016_2960_MOESM1_ESM.pdf]

# SECONDHAND SMOKE EXPOSURE AMONG BARS AND NIGHTCLUB EMPLOYEES (BAR QUESTIONNAIRE)

## General Instructions:

- Shaded areas are to be filled by the interviewer
- Read all questions, unless specified by a skip pattern
- Read all options for each question. Do not read the options “decline to answer” and “Don’t know/Not sure” and avoid using these options as much as possible.
- Mark only one option per question, unless specified

|                                                                                               |                                             |
|-----------------------------------------------------------------------------------------------|---------------------------------------------|
| BAR.ID Bar ID: ___ - ___ - ___<br>Region Country Bar                                          | BAR.IID Interviewer ID: ___ - ___ - ___     |
| BAR.DATE Date Completed: ___/___/___<br>DD MM YY                                              | BAR.TIME Time of Day: ___:___ (24 h format) |
| BAR.STS BAR STATUS: <input type="checkbox"/> Smoking 1 <input type="checkbox"/> Non-Smoking 2 |                                             |

We would like to ask you some basic questions about the bar / nightclub. Please let me know if you do not understand any of the questions. Please answer as best as you can.

## A. Key Informant Information

**KII.EQX 1. Did the key informant fill out the employee questionnaire?**  
Yes.....1  
No.....2

**EMP.ID If yes, please write down the subject ID from the employee questionnaire:**  
\_\_\_\_ - \_\_\_\_ - \_\_\_\_ - \_\_\_\_  
Region Country Bar Individual

**KII.JOB 2. Which is your Job title in the bar / nightclub? (If more than one position, mark the highest position)**

- Owner..... 1
- Manager..... 2
- Bartender (including bar back)..... 3
- Waiter (including other table services)..... 4
- Cook (including other kitchen jobs)..... 5
- Other ..... 6
- Decline to answer..... 9

KII.JOO (Specify) \_\_\_\_\_

## B. Bar / Night Club Characteristics

I'd like to ask you some questions about the characteristics of the bar / nightclub.

**BNC.YRS 3. How many years has been the bar / nightclub in business? \_\_\_\_\_ (in years)**  
Don't know / not sure..... 777

**BNC.NEI 4. What is the name of the area/ neighborhood in which the bar/nightclub is located?**

Area/ Neighborhood: \_\_\_\_\_

**BNC.SZE 5. What is the size of the indoor bar area open to customers? \_\_\_\_\_ (square meters)**

Don't know / not sure..... 777

**BNC.OCP 6. What is the maximum occupancy of the bar/nightclub? (Occupancy that is legally allowed)**

Total: \_\_\_\_\_

Don't know / not sure..... 777

**7. What are the hours of operation of the bar / nightclub (24h format)?**

|                  | MON                                                 | TUES                                                | WED                                                 | THURS                                               | FRI                                                 | SAT                                                 | SUN                                                 |
|------------------|-----------------------------------------------------|-----------------------------------------------------|-----------------------------------------------------|-----------------------------------------------------|-----------------------------------------------------|-----------------------------------------------------|-----------------------------------------------------|
| Not open         | <i>BNC.HMO</i><br><input type="checkbox"/><br>DK 99 | <i>BNC.HTU</i><br><input type="checkbox"/><br>DK 99 | <i>BNC.HWE</i><br><input type="checkbox"/><br>DK 99 | <i>BNC.HTH</i><br><input type="checkbox"/><br>DK 99 | <i>BNC.HFR</i><br><input type="checkbox"/><br>DK 99 | <i>BNC.HSA</i><br><input type="checkbox"/><br>DK 99 | <i>BNC.HSU</i><br><input type="checkbox"/><br>DK 99 |
| Open (time)      | <i>BNC.OT1</i><br>--:--                             | <i>BNC.OT2</i><br>--:--                             | <i>BNC.OT3</i><br>--:--                             | <i>BNC.OT4</i><br>--:--                             | <i>BNC.OT5</i><br>--:--                             | <i>BNC.OT6</i><br>--:--                             | <i>BNC.OT7</i><br>--:--                             |
| Close (time)     | <i>BNC.CT1</i><br>--:--                             | <i>BNC.CT2</i><br>--:--                             | <i>BNC.CT3</i><br>--:--                             | <i>BNC.CT4</i><br>--:--                             | <i>BNC.CT5</i><br>--:--                             | <i>BNC.CT6</i><br>--:--                             | <i>BNC.CT7</i><br>--:--                             |
| Total hours open | <i>BNC.TMO</i>                                      | <i>BNC.TTU</i>                                      | <i>BNC.TWE</i>                                      | <i>BNC.TTH</i>                                      | <i>BNC.TFR</i>                                      | <i>BNC.TSA</i>                                      | <i>BNC.TSU</i>                                      |

**BNC.EMP 8. How many employees work in this bar / nightclub? \_\_\_\_\_ employees**

Don't know / not sure..... 777

**BNC.ECS 9. Do you know how many of the employees currently smoke?**

Yes..... 1 *BNC.EHM* How many: \_\_\_\_\_

No..... 2

Don't know / not sure..... 777

**BNC.CWD 10. How many customers are served on an average weekday night (Sunday – Thursday)?**

\_\_\_\_\_ Don't know / not sure..... 777

**BNC.CWN 11. How many customers are served on an average weekend night (Friday – Saturday)?**

\_\_\_\_\_ Don't know / not sure..... 777

**BNC.AGE 12. What is your estimate of the average age of the customers?**

<18..... 1

18-24..... 2

25-29..... 3

30-39..... 4

40 and above..... 5

Mixed/all ages..... 6

Don't know / not sure..... 777

**BNC.EDU 13. What is your estimate of the average education level of the customers?**

Primary school or less..... 1

High school education..... 2

College/University education..... 3

Mixture of education levels..... 4

Don't know / not sure..... 7

**BNC.LOC 14. Where are the usual customers of the bar / nightclub from?**

- Local/neighborhood crowd..... 1
- Customers from all over the city..... 2
- Tourist/out-of-towners.....3
- Mixed crowd.....4
- Don't know / not sure..... 7

**BNC.CCS 15. What is your estimate of the percentage of customers who smoke inside of the bar/nightclub?**

- None..... 1
- 1 to 24%..... 2
- 25 to 50%.....3
- 50 to 74%.....4
- 75% or more.....5
- Don't know..... 7

**BNC.VEN 16. Does the bar/nightclub have a ventilation system for extracting smoke?**

- Yes..... 1
- No..... 2
- Don't know / not sure..... 7

**BNC.VON 17. If yes, is the ventilation system on during opening hours?**

- Yes..... 1
- No..... 2
- Sometimes.....3

**BNC.ACS 18. Does the bar/nightclub have an air conditioning system?**

- Yes..... 1
- No..... 2
- Don't know / not sure..... 7

**BNC.AON 19. If yes, is the air conditioning system on during opening hours?**

- Yes..... 1
- No..... 2
- Sometimes.....3

**BNC.OUT 20. Does the bar / nightclub have an outdoor area (terrace, patio, other)?**

- Yes..... 1
- No..... 2

**BNC.FOD 21. Does the bar / nightclub serve food?**

- Yes, full menu..... 1
- Yes, only small plates.....2
- No..... 3

**BNC.DAN 22. Is there space designated for dancing?**

- Yes..... 1
- No..... 2

**BNC.MUS 23. Does the bar/nightclub offer live music (at any time during the week)?**

- Yes..... 1
- No..... 2

**C. Smoking Policy**

*Now I'd like to ask you some questions about smoking policies of the bar/nightclub.*

**POL.POL 24. Does this establishment have a policy that restricts smoking in any way?**

- Yes..... 1
- No..... 2
- Don't know / not sure..... 7

**BNC.WRI 25. If yes, is the smoking policy in a written format?**

- Yes..... 1
- No..... 2
- Don't know / not sure..... 7

**POL.IND 26. Please specify which of these best describes this bar / nightclub smoking policy for indoor areas**

- Not allowed in any indoor areas..... 1 → 26.1
- Allowed in some indoor areas ..... 2 → 26.2 and 26.3
- Allowed in all indoor areas ..... 3 → 26.2 and 26.3
- Don't know/ not sure..... 7

**POL.INF 26.1 If smoking is not allowed in any indoor area, is this policy strictly enforced?**

- Yes..... 1
- No..... 2
- Don't know / not sure..... 7

**POL.REA 26.2 If smoking is allowed, what are the main reasons?**

- Customers preference..... 1
- Concern over lost profits.....2
- Both..... 3
- Other ..... 4 *POL.REO Specify: \_\_\_\_\_*
- Don't know / not sure.....7
- Decline to answer.....9

**POL.VOL 26.3. If smoking is allowed, how likely is the bar/nightclub to go voluntarily smoke-free in the next 12 months?**

- Very likely.....1
- Somewhat likely..... 2
- Somewhat unlikely.....3
- Very unlikely.....4
- Don't know / not sure.....7
- Decline to answer..... 9

**POL.SGN 27. Are there “No Smoking” signs posted inside the bar/nightclub?**

- Yes..... 1
- No..... 2

**POL.CIG 28. Are cigarettes sold anywhere inside the bar/nightclub?**

- Yes..... 1
- No..... 2

**CIG.SLD 28.1 If yes, how are cigarettes sold?**

- Vending machines.....1
- Over the bar counter.....2
- Outside vendors.....3
- Other.....4
- Don't know / not sure..... 7

**POL.TOB 29. Is there tobacco advertising in the bar/nightclub?**

- Yes..... 1
- No..... 2

**TOB.ADV 29.1 If yes, please describe:** \_\_\_\_\_

\_\_\_\_\_

**POL.PRO 30. Do you receive free promotional items from tobacco companies?**

- Yes..... 1
- No..... 2

**PRO.TOB 30.1. If yes, please describe:** \_\_\_\_\_

\_\_\_\_\_

**EMP.PRE 31. Now, as a last question, how many employees are present now?**

\_\_\_\_\_ employees

Don't know .....777

*This is the end of the bar / nightclub questionnaire. Thank you very much for your collaboration.*

**AIR SAMPLE MONITORING SAMPLE SHEET (To be filled by the field worker)**

*In each bar, 2 monitors must be placed for a 1 week period. If the bar has a smoking and a non-smoking area, place one monitor in each area. If the bar has two or more different spaces or rooms, you can place monitor 1 in one room and monitor 2 in another room. If the bar has only one space or room and there is no distinction between smoking-non-smoking areas, place each monitor in two different areas within the space, such as one monitor in the bar area and the other monitor in the tables area.*

|                                                                                                                                                                                                                                |
|--------------------------------------------------------------------------------------------------------------------------------------------------------------------------------------------------------------------------------|
| <b>AIR.AM1 Air Monitor 1 ID:</b> ___ - ___ - ___ - _____<br><div style="display: flex; justify-content: space-around; font-size: small;"> <span>Region</span> <span>Country</span> <span>Bar</span> <span>Lab ID</span> </div> |
|--------------------------------------------------------------------------------------------------------------------------------------------------------------------------------------------------------------------------------|

*AIR.DUP* Does a duplicate air monitor accompany air monitor 1 (only 1 duplicate every 10 air monitors 1 or 2 placed)?

- Yes 1    *AIR.DID* If yes, please indicate Duplicate Air Monitor ID:    \_\_\_ - \_\_\_ - \_\_\_ - \_\_\_\_\_
  - No 2
- Region
Country
Bar
Lab ID

*AIR.BLK* Does a blank air monitor accompany air monitor 1 (only 1 blank every 10 air monitors 1 or 2 placed)?

- Yes 1    *AIR.BID* If yes, please indicate Blank Air Monitor ID:    \_\_\_ - \_\_\_ - \_\_\_ - \_\_\_\_\_
  - No 2
- Region
Country
Bar
Lab ID

*AIR.DPI* Date of placement:    \_\_\_ / \_\_\_ / \_\_\_    *AIR.TPI* Time:    \_\_\_ : \_\_\_ (24h)

*AIR.DVI* Date of visit:    \_\_\_ / \_\_\_ / \_\_\_    *AIR.TVI* Time:    \_\_\_ : \_\_\_ (24h)

*AIR.DRI* Date of removal:    \_\_\_ / \_\_\_ / \_\_\_    *AIR.TRI* Time:    \_\_\_ : \_\_\_ (24h)

*AIR.PLI* Place within the bar or night club: \_\_\_\_\_

Room dimensions:    *AIR.RLI* Length:    \_\_\_ x *AIR.RWI* Width    \_\_\_ x *AIR.RHI* Height    \_\_\_ (meters)  
*AIR.RDI* Volume:    \_\_\_ m<sup>3</sup>

*AIR.SAI* Is smoking allowed in this room/area?

- Yes..... 1
- No..... 2

*AIR.NDI* Number of doors open to outdoor areas: \_\_\_\_\_

*AIR.MDI* Most doors are:

- Hollow or always open..... 1
- Cloth, bamboo, other soft material..... 2
- Wood, glass, other hard material..... 3

*AIR.NWI* Number of windows open to outdoor areas: \_\_\_\_\_

*AIR.MWI* Most windows are:

- Hollow or always open..... 1
- Cloth, bamboo, other soft material..... 2
- Wood, glass, other hard material..... 3

*OPN.PTI* Overall, what percent of the establishment walls are generally open to outdoor air through doors, windows and other open spaces?

- 0%..... 1
- 0 to 9%..... 2
- 10 to 24%..... 3
- 24 to 49%..... 4
- 50% or more..... 5

|                                                                                   | <b>Placement</b>                      | <b>Visit day</b>              | <b>Removal</b>                 |
|-----------------------------------------------------------------------------------|---------------------------------------|-------------------------------|--------------------------------|
| Are the doors open?                                                               | <i>AIR.DOPI</i><br>Circle: Yes 1/No 2 | <i>AIR.DОВ1</i><br>Yes 1/No 2 | <i>AIR.DOR1</i><br>Yes 1/ No 2 |
| Are the windows open?                                                             | <i>AIR.WOPI</i><br>Yes 1/No 2         | <i>AIR.WOV1</i><br>Yes 1/No 2 | <i>AIR.WOR1</i><br>Yes 1/ No 2 |
| Is a ventilation system or AC on?                                                 | <i>AIR.VSPI</i><br>Yes 1/No 2         | <i>AIR.VSV1</i><br>Yes 1/No 2 | <i>AIR.VSR1</i><br>Yes 1/ No 2 |
| Monitor in the correct place?                                                     |                                       | <i>AIR.CPVI</i><br>Yes 1/No 2 | <i>AIR.CPR1</i><br>Yes 1/No 2  |
| If not in the correct place, could you find it?                                   |                                       | <i>AIR.FIVI</i><br>Yes 1/No 2 | <i>AIR.FIVI</i><br>Yes 1/No 2  |
| If found in the incorrect location, where did you find it? <i>AIR.WHI</i> _____   |                                       |                               |                                |
| For visit day only (on a day and time of average occupancy):                      |                                       |                               |                                |
| <i>AIR.EOI</i> Estimated occupancy: _____                                         |                                       |                               |                                |
| <i>AIR.NSI</i> Number of smokers visible during a 15-minute period: _____         |                                       |                               |                                |
| <i>AIR.MDI</i> Minimal distance to the filter of the nearest smoker: _____ meters |                                       |                               |                                |

|                                                                                                                                                                                     |
|-------------------------------------------------------------------------------------------------------------------------------------------------------------------------------------|
| <b>AIR.AM2 Air Monitor 2 ID:</b> ___ - ___ - ___ - ___ - ___<br><div style="text-align: center; font-size: small;">             Region    Country    Bar    Lab ID           </div> |
|-------------------------------------------------------------------------------------------------------------------------------------------------------------------------------------|

AIR.DP2 Date of placement:    \_\_\_ / \_\_\_ / \_\_\_ AIR.TP2 Time: \_\_\_ : \_\_\_ (24h)

AIR.DV2 Date of visit:        \_\_\_ / \_\_\_ / \_\_\_ AIR.TV2 Time: \_\_\_ : \_\_\_ (24h)

AIR.DR2 Date of removal:     \_\_\_ / \_\_\_ / \_\_\_ AIR.TR2 Time: \_\_\_ : \_\_\_ (24h)

AIR.PL2 Place within the bar or night club: \_\_\_\_\_

AIR.AMS Is this room the same than for Air Monitor 1?

Yes the room is the same..... 1

No, the room is different but it is communicated with the previous room..... 2

No, the room is different and it is completely separated from the previous room..... 3

*If the room is the same, this is the end of the questionnaire → fill the diagram.*

*If the room is different, please continue with the questionnaire:*

AIR.RD2 Room dimensions:    AIR.RLJLength: \_\_\_\_\_ x AIR.RWJWidth \_\_\_\_\_ x AIR.RHJ Height \_\_\_\_\_

AIR.SA2 Is smoking allowed in this room/area?

Yes..... 1

No..... 2

AIR.ND2 Number of doors open to outdoor areas: \_\_\_\_\_

AIR.DM2 Most doors are:

Hollow or always open..... 1

Cloth, bamboo, other soft material..... 2

Wood, glass, other hard material..... 3

AIR.NW2 Number of windows open to outdoor areas: \_\_\_\_\_

AIR.WM2 Most windows are:

Hollow or always open..... 1

Cloth, bamboo, other soft material..... 2

Wood, glass, other hard material..... 3

OPN.PT2 Overall, what percent of the establishment walls are generally open to outdoor air through doors, windows and other open spaces?

0%..... 1

0 to 9%..... 2

10 to 24%..... 3

24 to 49%..... 4

50% or more..... 5

|                       | <b>Placement</b>          | <b>Visit day</b> | <b>Removal</b>  |
|-----------------------|---------------------------|------------------|-----------------|
|                       | <i>AIR.DOP2</i>           | <i>AIR.DOV2</i>  | <i>AIR.DOR2</i> |
| Are the doors open?   | <i>Circle:</i> Yes 1/No 2 | Yes 1/No 2       | Yes 1/ No 2     |
|                       | <i>AIR.WOP2</i>           | <i>AIR.WOV2</i>  | <i>AIR.WOR2</i> |
| Are the windows open? | Yes 1/No 2                | Yes 1/No 2       | Yes 1/ No 2     |



Is a ventilation system or AC on? *AIR.VSP2* *AIR.VSV2* *AIR.VSR2*  
 Yes 1/No 2 Yes 1/No 2 Yes 1/ No 2

Monitor in the correct place? *AIR.CPV2* *AIR.CPR2*  
 Yes 1/No 2 Yes 1/No 2

If not in the correct place, could you find it? *AIR.FIV2* *AIR.FIV2*  
 Yes 1/No 2 Yes 1/No 2

If found in the incorrect location, where did you find it? *AIR.WH2* \_\_\_\_\_

For visit day only (on a day and time of average occupancy):

*AIR.EO2* Estimated occupancy: \_\_\_\_\_

*AIR.NS2* Number of smokers visible during a 15-minute period: \_\_\_\_\_

*AIR.MD2* Minimal distance to the filter of the nearest smoker: \_\_\_\_\_ meters

**Diagram to indicate the location of the air monitors and of the outdoor windows and doors within the bar**

Location in room of air monitors 1 and 2 (and duplicate and blanks if corresponding). Please indicate on diagram the location of the monitor and any windows and doors that open to outdoor air:

**Area 1**

**Area 2** (If both monitors are in same room, use first box for both)

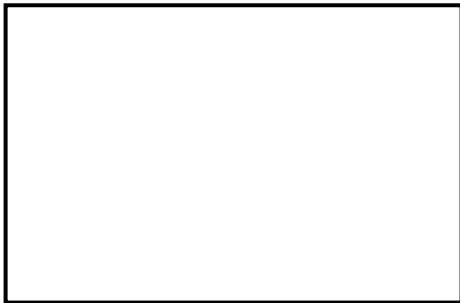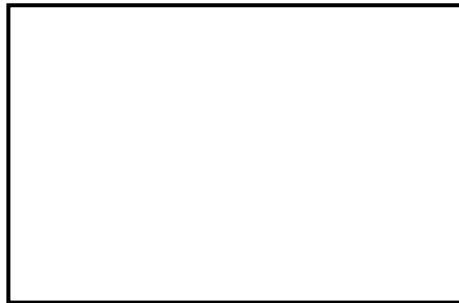

|               |              |                                     |                                        |                                    |
|---------------|--------------|-------------------------------------|----------------------------------------|------------------------------------|
| <b>X1, X2</b> | Air monitors | <input type="checkbox"/> (X) normal | <input type="checkbox"/> (D) duplicate | <input type="checkbox"/> (B) blank |
|               | Door         |                                     |                                        |                                    |
|               | Window       |                                     |                                        |                                    |

*AIR.COB* Other comments and observations related to the air samplers or bar:

---



---



---
